# Supplementary material for: The OsABF1 transcription factor improves drought tolerance by activating the transcription of COR413-TM1 in rice
Source: PubMed Central journal article supplement (PMC5853872; doi:10.1093/jxb/erx260), 2017-08-12
Supplement: erx260_suppl_supplementary_figures_s1_s15.pdf [file erx260_suppl_supplementary_figures_s1_s15.pdf]

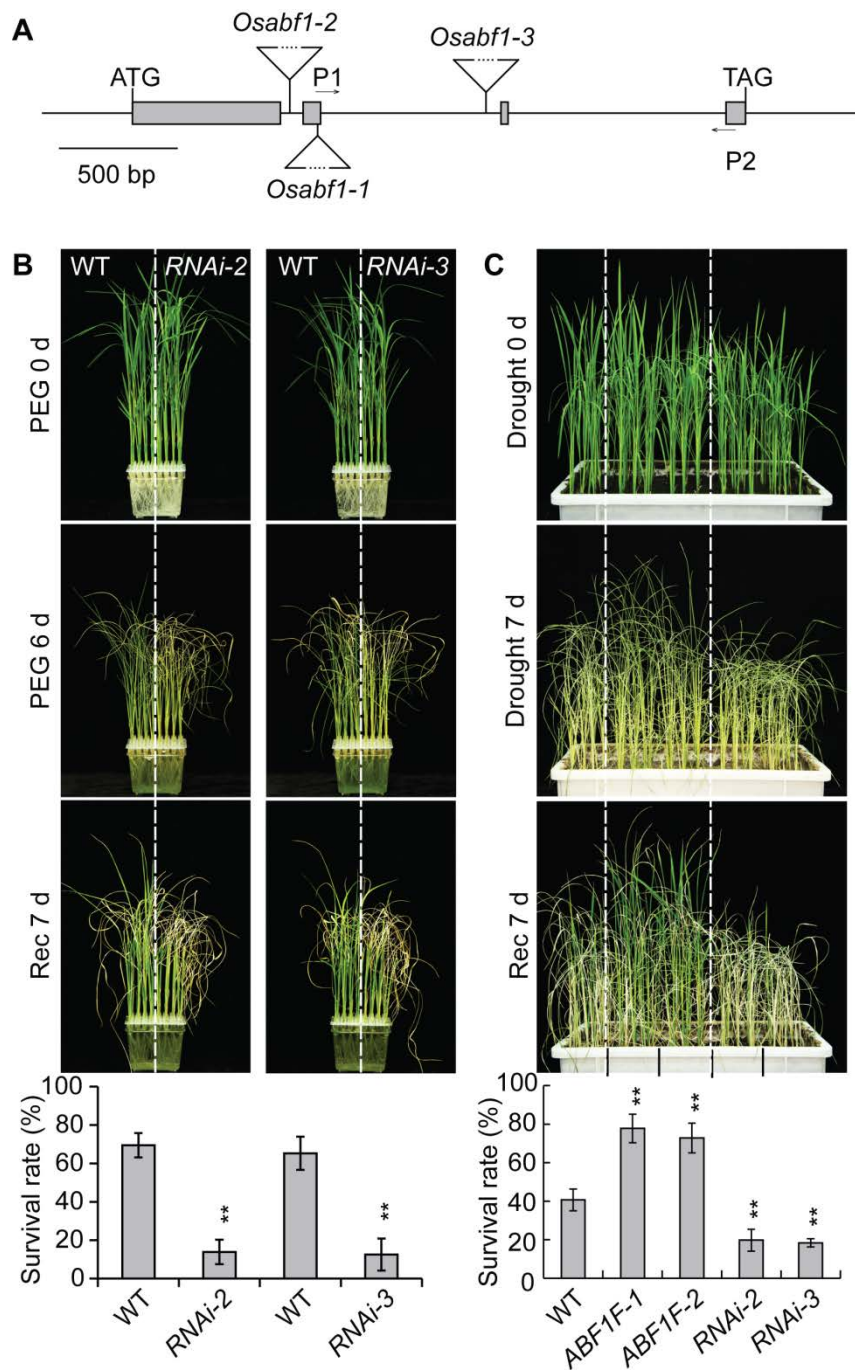

**Supplemental Figure S1.** Diagrams of T-DNA insertion positions and the performance of *OsABF1-RNAi* lines under osmotic stress. A. Schematic representation of the T-DNA insertion mutants in *OsABF1* gene, *osabf1-1*, *osabf1-2* and *osabf1-3*. B. Images of the WT and *OsABF1-RNAi* transgenic plants taken before 20% PEG treatment (PEG 0 d), after the roots of seedling were submerged in PEG for 6 days (PEG 6), and then after plants were restored to water for 7 days (Rec 7). C. Images of the WT, *OsABF1-RNAi* and *ABF1F* transgenic plants taken before water deprivation treatment (Drought 0 d), after water deprivation for 7 days (Drought 7 d), and then after plants were restored to water for 7 days (Rec 7 d). Survival rate with statistics after recovery. Mean values  $\pm$  s.d. are shown. The values of the indicated genotypes were compared to that of the WT (Student's *t*-tests, \*\* $p < 0.01$ ,  $n = 3$ ).

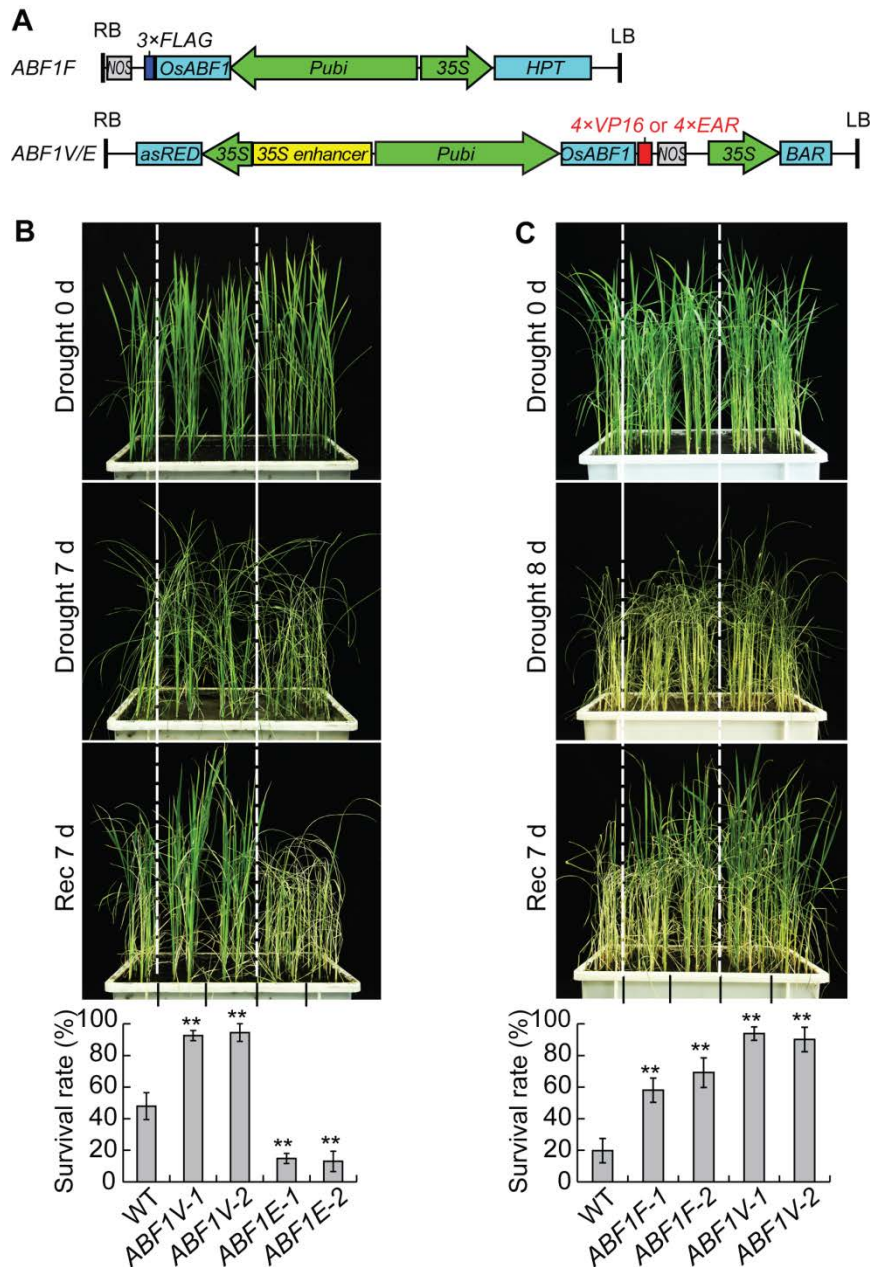

**Supplemental Figure S2.** Diagram of the *OsABF1* HTF constructions and the performance of *OsABF1* transgenic lines under water deprivation condition. A. Diagrams of the *OsABF1* HTF constructions. B. Images of the WT, *OsABF1V* and *OsABF1E* transgenic plants taken before water deprivation treatment (Drought 0 d), after water deprivation for 7 days (Drought 7 d), and then after plants were restored to water for 7 days (Rec 7 d). C. Images of the WT, *OsABF1F* and *OsABF1V* transgenic plants taken before water deprivation treatment (Drought 0 d), after water deprivation for 8 days (Drought 7 d), and then after plants were restored to water for 7 days (Rec 7 d). Survival rate with statistics after recovery. Mean values  $\pm$  s.d. are shown. The values of the indicated genotypes were compared to that of the WT (Student's *t*-tests, \*\* $p < 0.01$ ,  $n = 3$ ).

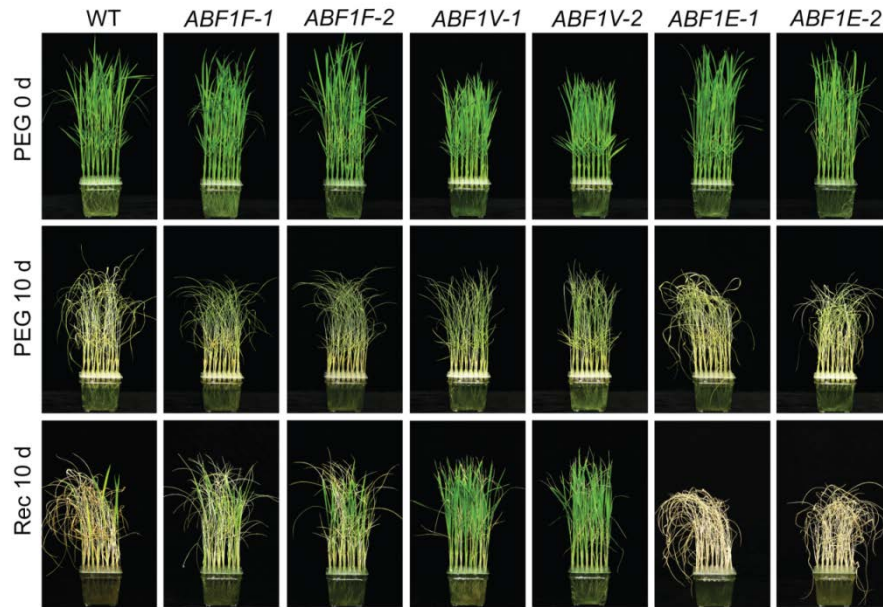

**Supplemental Figure S3.** Performance of *OsABF1V*, *OsABF1E* and *OsABF1F* lines under polyethylene glycol (PEG) treatment. Representative images of indicated genotypes subjected to PEG treatment. Plants were grown under long days (LDs, 14 hours light/10 hours dark) for three weeks before treatment with 20% PEG. The images were taken before PEG treatment (PEG 0 d), after the roots of seedling were submerged in PEG for 10 days (PEG 10) and then restored to water for 10 days (Rec 10) respectively.

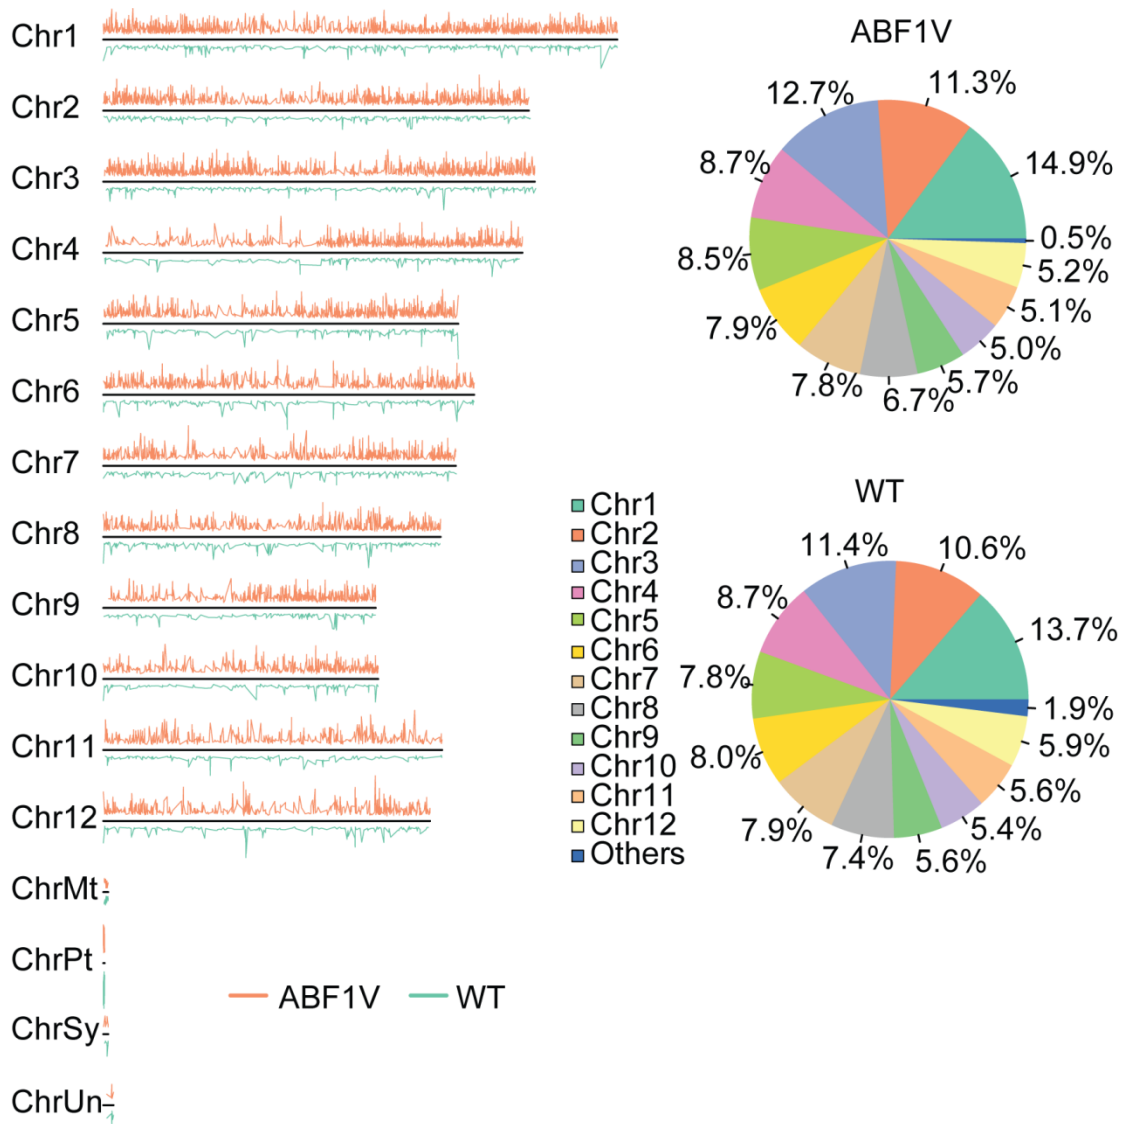

**Supplemental Figure S4.** Genome-wide distribution of ABF1V-associated sites. The numbers in the pie charts indicate the percentage of peaks in each chromosome.

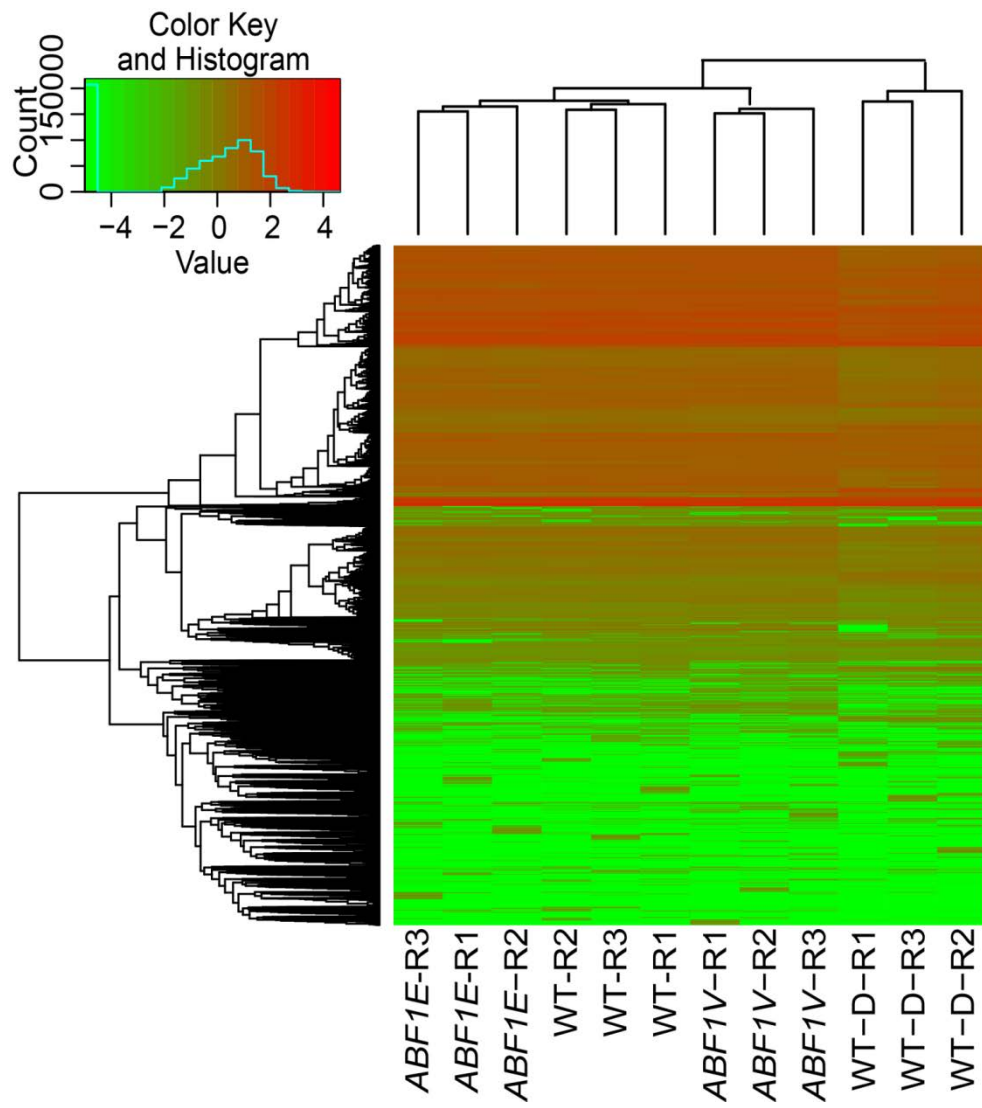

Supplemental Figure S5. Heat map of RNA-seq data.

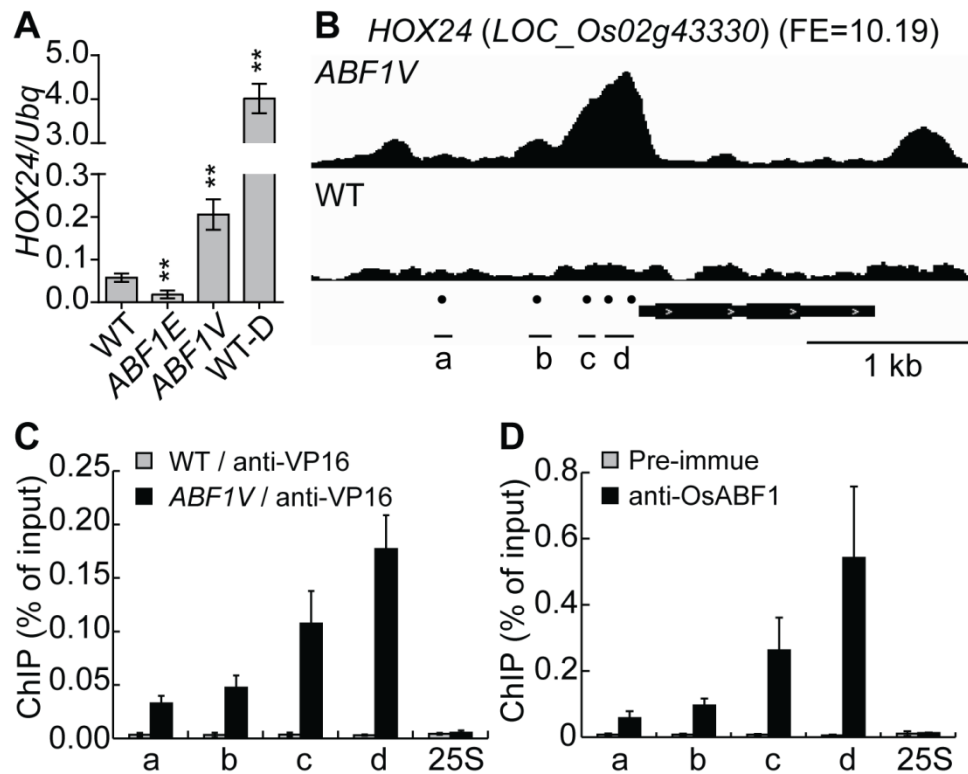

**Supplemental Figure S6.** Identification of *HOX24* as a direct target of ABF1V. A, Transcriptional analysis of *HOX24* in the WT, *ABF1E* and *ABF1V* transgenic lines, and the WT-D by qRT-PCR with normalization to *Ubq*. Mean values  $\pm$  s.e.m. are shown (Student's *t*-tests,  $**p < 0.01$ ,  $n = 3$ ). B, ABF1V binding profile in the promoter of *HOX24* in the ChIP-seq data. The bar at the bottom represents the position of the DNA fragment containing the ACGTG(G/T)(C/A) motif which indicated with black dots. C, Verification of OsABF1V direct binding to the indicated DNA fragments as shown in B by ChIP-qPCR analysis. ChIP samples were prepared using anti-VP16 antibodies and subjected to qPCR analysis. Results of ChIP-qPCR were quantified by normalization of the immunoprecipitation signal to the corresponding input signal. The binding to 25S rDNA was used as a negative control. The means  $\pm$  s.d. ( $n = 3$ ) are shown. D, Verification of OsABF1 direct binding sites in the *HOX24* promoter by ChIP-qPCR analysis. ChIP samples were prepared using WT rice and precipitated with anti-OsABF1 antibodies or with the pre-immune serum as a negative control. The means  $\pm$  s.d. ( $n = 3$ ) are shown.

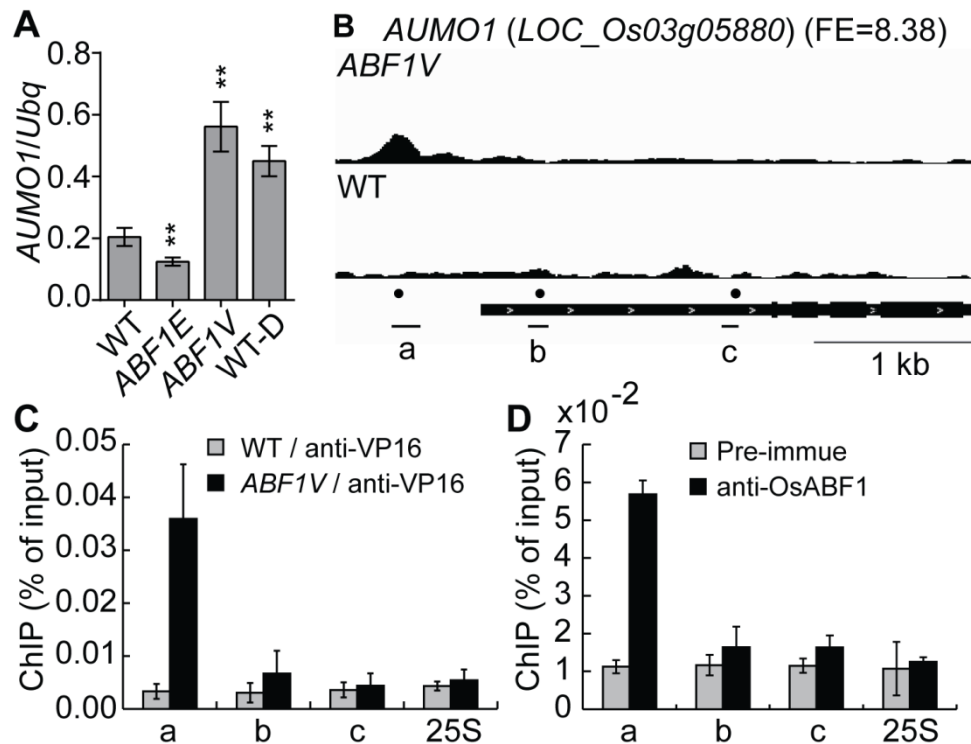

**Supplemental Figure S7.** Identification of *AUMO1* as a direct target of OsABF1. A, Transcriptional analysis of *AUMO1* in the WT, the *ABF1E* and *ABF1V* transgenic lines, and the WT-D by qRT-PCR with normalization to *Ubq*. Mean values  $\pm$  s.e.m. are shown (Student's *t*-tests,  $^{***}p < 0.01$ ,  $n = 3$ ). B, *ABF1V* binding profile in the promoter of *AUMO1* in the ChIP-seq data. The bar at the bottom represents the position of the DNA fragment containing the ACGTG(G/T)(C/A) motif which indicated with black dots. C, Verification of OsABF1V direct binding to the indicated DNA fragments as shown in B by ChIP-qPCR analysis. ChIP samples were prepared using anti-VP16 antibodies and subjected to qPCR analysis. Results of ChIP-qPCR were quantified by normalization of the immunoprecipitation signal with the corresponding input signal. The binding to 25S rDNA was used as a negative control. The means  $\pm$  s.d. ( $n = 3$ ) are shown. D, Verification of OsABF1 direct binding sites in the *AUMO1* promoter by ChIP-qPCR analysis. ChIP samples were prepared using WT rice and precipitated with anti-OsABF1 antibodies or with the pre-immune serum as a negative control. The means  $\pm$  s.d. ( $n = 3$ ) are shown.

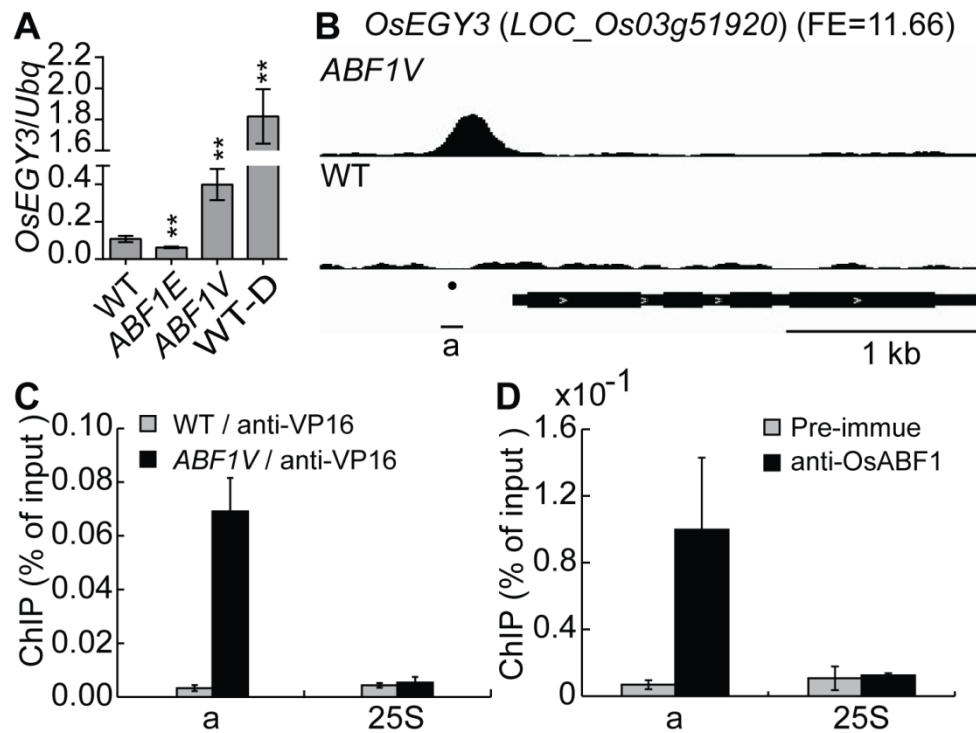

**Supplemental Figure S8.** Identification of *OsEGY3* as a direct target of OsABF1. A, Transcriptional analysis of *OsEGY3* in the WT, the *ABF1E* and *ABF1V* transgenic lines, and the WT-D by qRT-PCR with normalization to *Ubq*. Mean values  $\pm$  s.e.m. are shown (Student's *t*-tests,  $**p < 0.01$ ,  $n = 3$ ). B, *ABF1V* binding profile in the promoter of *OsEGY3* in the ChIP-seq data. The bar at the bottom represents the position of the DNA fragment containing the ACGTG(G/T)(C/A) motif which indicated with black dots. C, Verification of OsABF1V direct binding to the indicated DNA fragment as shown in (B) by ChIP-qPCR analysis. ChIP samples were prepared using anti-VP16 antibodies and subjected to qPCR analysis. Results of ChIP-qPCR were quantified by normalization of the immunoprecipitation signal with the corresponding input signal. The binding to 25S rDNA was used as a negative control. The means  $\pm$  s.d. ( $n = 3$ ) are shown. D, Verification of OsABF1 direct binding sites in the *OsEGY3* promoter by ChIP-qPCR analysis. ChIP samples were prepared using WT rice and precipitated with anti-OsABF1 antibodies or with the pre-immune serum as a negative control. The means  $\pm$  s.d. ( $n = 3$ ) are shown.



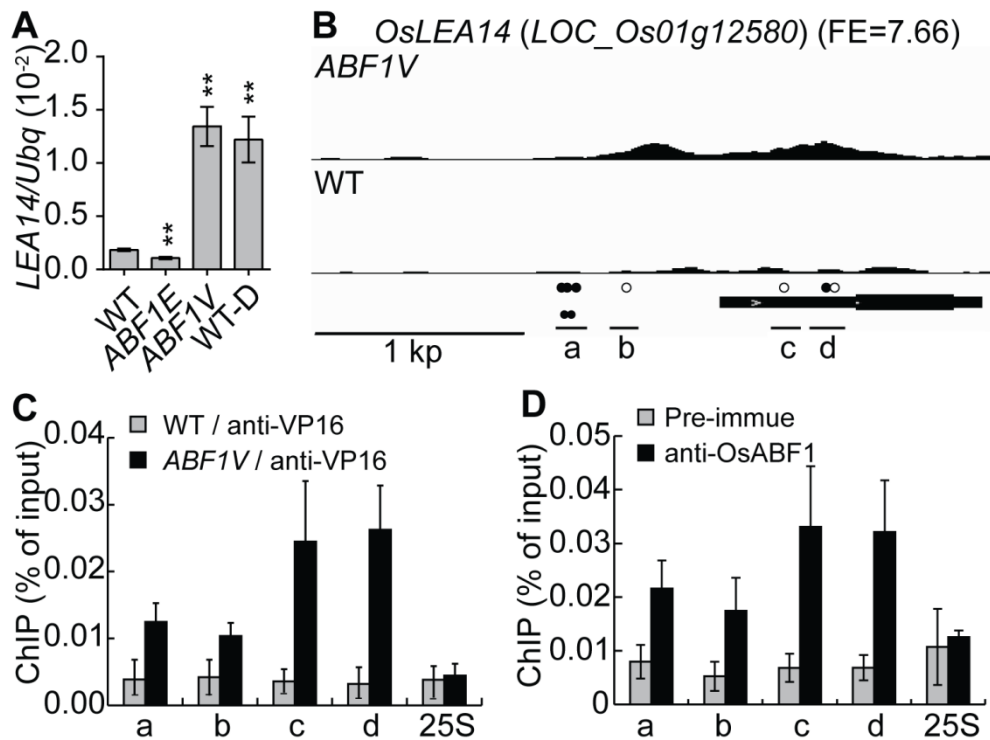

**Supplemental Figure S9.** Identification of *LEA14* as a direct target of OsABF1. A, Transcriptional analysis of *LEA14* in the WT, the *ABF1E* and *ABF1V* transgenic lines, and the WT-D by qRT-PCR with normalization to *Ubq*. Mean values  $\pm$  s.e.m. are shown (Student's *t*-tests,  $**p < 0.01$ ,  $n = 3$ ). B, ABF1V binding profile in the promoter of *LEA14* in the ChIP-seq data. The bars at the bottom represent the distribution of DNA fragments containing the ACGTG(G/T)(C/A) motif or ACGT core as indicated by black or white dots. C, Verification of OsABF1V direct binding to the indicated DNA fragment as shown in B by ChIP-qPCR analysis. ChIP samples were prepared using anti-VP16 antibodies and subjected to qPCR analysis. Results of ChIP-qPCR were quantified by normalization of the immunoprecipitation signal with the corresponding input signal. The binding to 25S rDNA was used as a negative control. The means  $\pm$  s.d. ( $n = 3$ ) are shown. D, Verification of OsABF1 direct binding sites in the *LEA14* promoter by ChIP-qPCR analysis. ChIP samples were prepared using WT rice and precipitated with anti-*OsABF1* antibodies or with the pre-immune serum as a negative control. The means  $\pm$  s.d. ( $n = 3$ ) are shown.

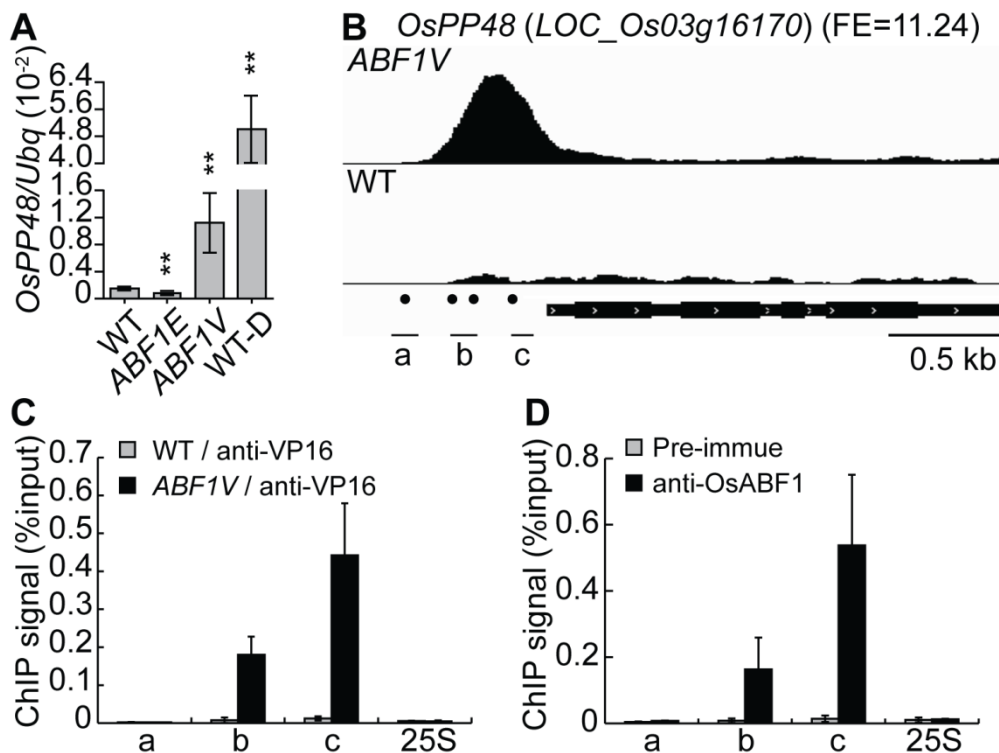

**Supplemental Figure S10.** Identification of *OsPP48* as a direct target of OsABF1. A, Transcriptional analysis of *OsPP48* in the WT, the *ABF1E* and *ABF1V* transgenic lines, and the WT-D by qRT-PCR with normalization to *Ubq*. Mean values  $\pm$  s.e.m. are shown (Student's *t*-tests,  $**p < 0.01$ ,  $n = 3$ ). B, ABF1V binding profile in the promoter of *OsPP48* in the ChIP-seq data. The bar at the bottom represents the position of the DNA fragment containing the ACGTG(G/T)(C/A) motif which indicated with black dots. C, Verification of OsABF1V direct binding to the indicated DNA fragment as shown in B by ChIP-qPCR analysis. ChIP samples were prepared using anti-VP16 antibodies and subjected to qPCR analysis. Results of ChIP-qPCR were quantified by normalization of the immunoprecipitation signal with the corresponding input signal. The binding to 25S rDNA was used as a negative control. The means  $\pm$  s.d. ( $n = 3$ ) are shown. D, Verification of OsABF1 direct binding sites in the *OsPP48* promoter by ChIP-qPCR analysis. ChIP samples were prepared using WT rice and precipitated with anti-OsABF1 antibodies or with the pre-immune serum as a negative control. The means  $\pm$  s.d. ( $n = 3$ ) are shown.

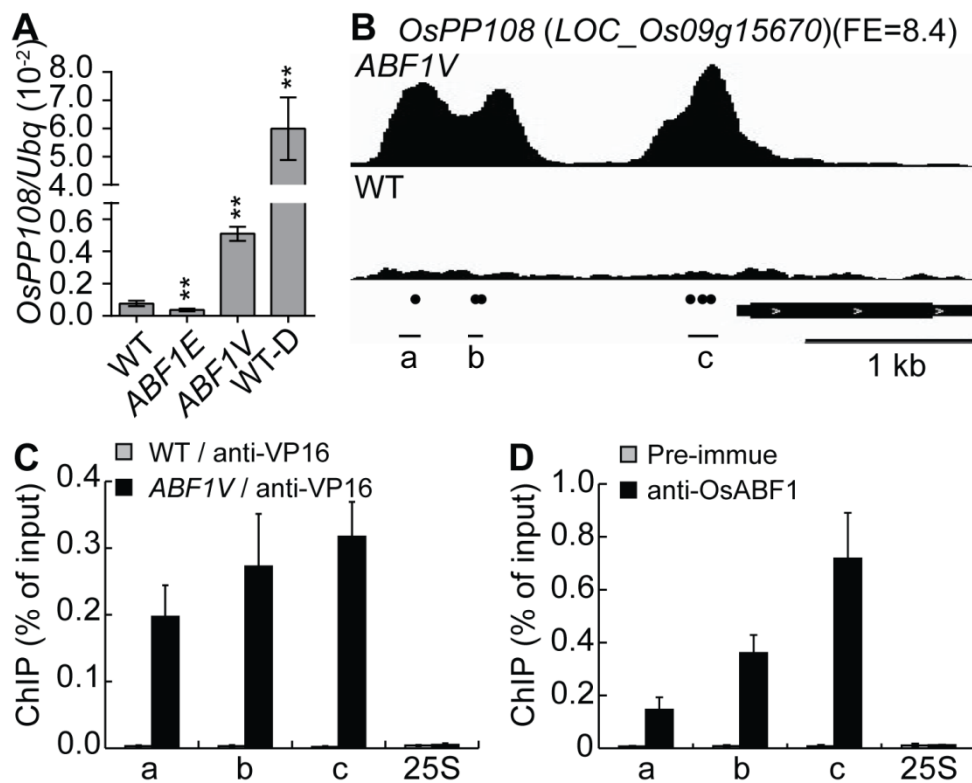

**Supplemental Figure S11.** Identification of *OsPP108* as a direct target of OsABF1. A, Transcriptional analysis of *OsPP108* in the WT, the *ABF1E* and *ABF1V* transgenic lines, and the WT-D by qRT-PCR with normalization to *Ubq*. Mean values  $\pm$  s.e.m. are shown (Student's *t*-tests,  $**p < 0.01$ ,  $n = 3$ ). B, ABF1V binding profile in the promoter of *OsPP108* in the ChIP-seq data. The bar at the bottom represents the position of the DNA fragment containing the ACGTG(G/T)(C/A) motif which indicated with black dots. C, Verification of OsABF1V direct binding to the indicated DNA fragment as shown in B by ChIP-qPCR analysis. ChIP samples were prepared using anti-VP16 antibodies and subjected to qPCR analysis. Results of ChIP-qPCR were quantified by normalization of the immunoprecipitation signal with the corresponding input signal. The binding to 25S rDNA was used as a negative control. The means  $\pm$  s.d. ( $n = 3$ ) are shown. D, Verification of OsABF1 direct binding sites in the *OsPP108* promoter by ChIP-qPCR analysis. ChIP samples were prepared using WT rice and precipitated with anti-OsABF1 antibodies or with the pre-immune serum as a negative control. The means  $\pm$  s.d. ( $n = 3$ ) are shown.

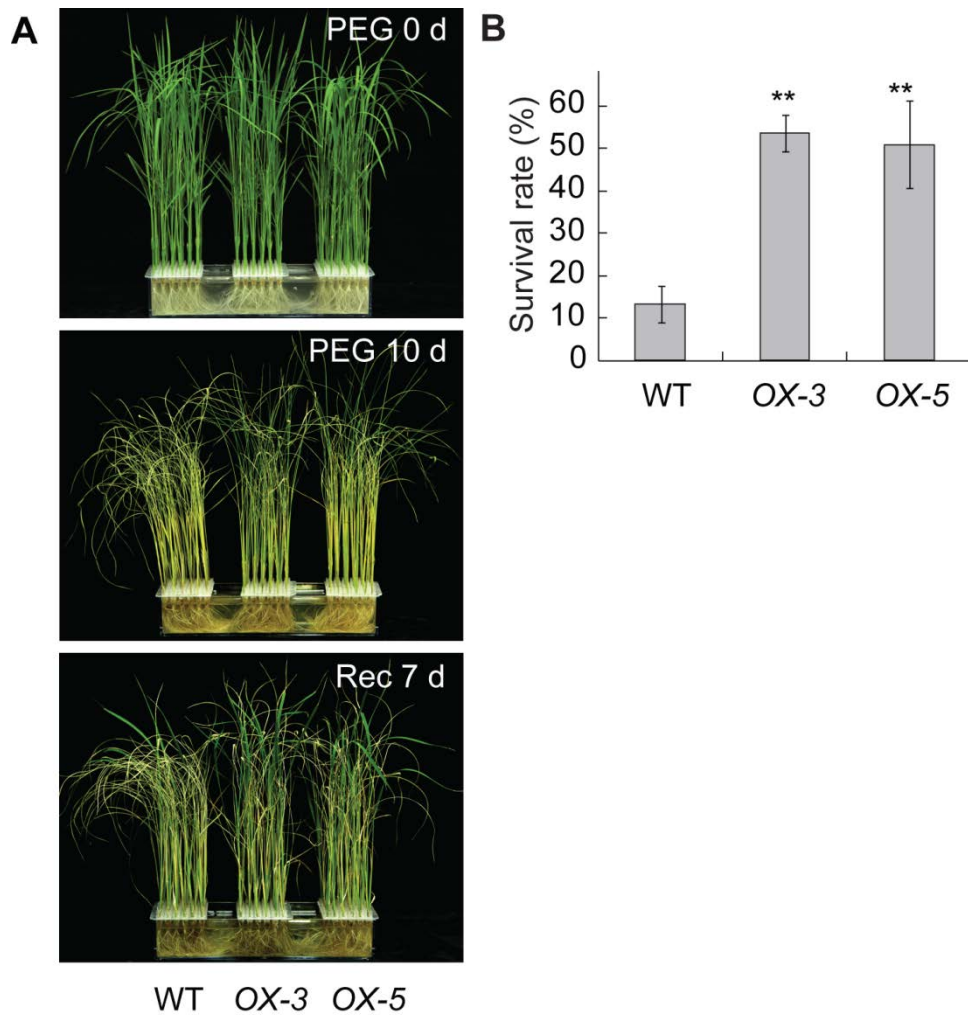

**Supplemental Figure 12.** Performance of *COR413-TMI* overexpression lines under osmotic stress. A, The images of WT and the *COR413-TMI* overexpression plants (*OX-3* and *OX-5*) subjected to PEG treatment. 21-day-old seedlings grown in water were transferred into 20% PEG for 10 days (PEG 10 d) and then recovered in water for 7 days (Rec 7 d). B, Survival rate of the indicated genotypes subjected to PEG treatment as in A. Mean values  $\pm$  s.d. are shown. The value of the indicated genotype was compared to that of the WT (Student's *t*-tests, \*\* $p < 0.01$ ,  $n = 3$ ).

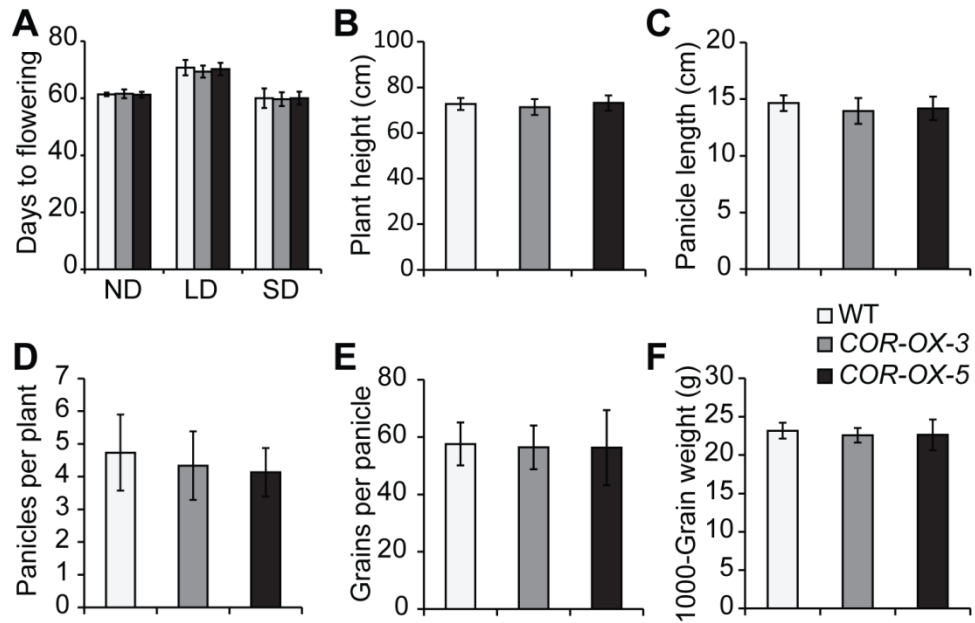

**Supplemental Figure S13.** Phenotype analysis of *COR413-TM1* overexpression plants.

(A) - (F): Comparison of heading date, plant height, panicle length, panicle per plant, grains per panicle and 1000 grain weight between WT and *COR413-TM1* overexpression rice. Data are shown as means  $\pm$  s.d. (Student's t tests, \*P < 0.05, \*\*P < 0.01, n=60).

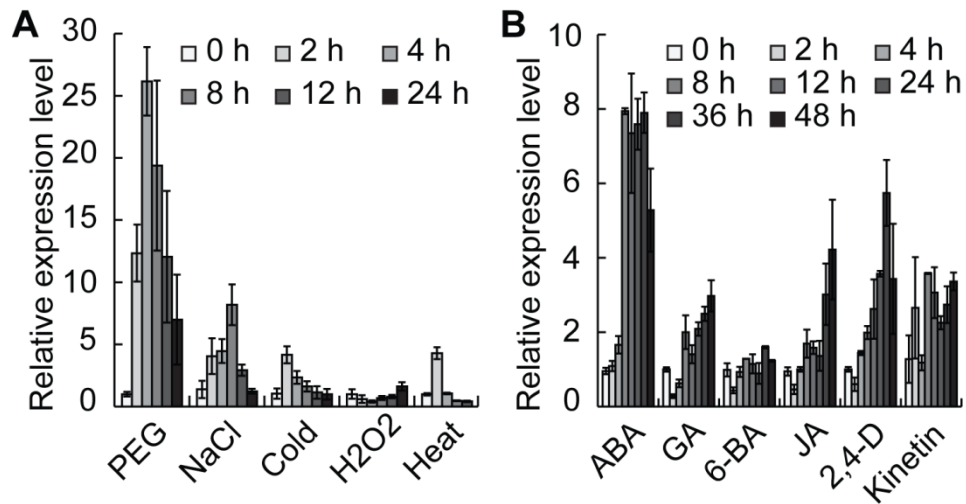

**Supplemental Figure S14.** Dynamic transcription of *OsCOR413-TM1* under abiotic stress or hormone treatments. A, Time-series mRNA levels under abiotic stress. B, Time-series mRNA levels under hormone treatments. The seedlings were grown in continuous light for 3 weeks and then subjected to the indicated treatments.

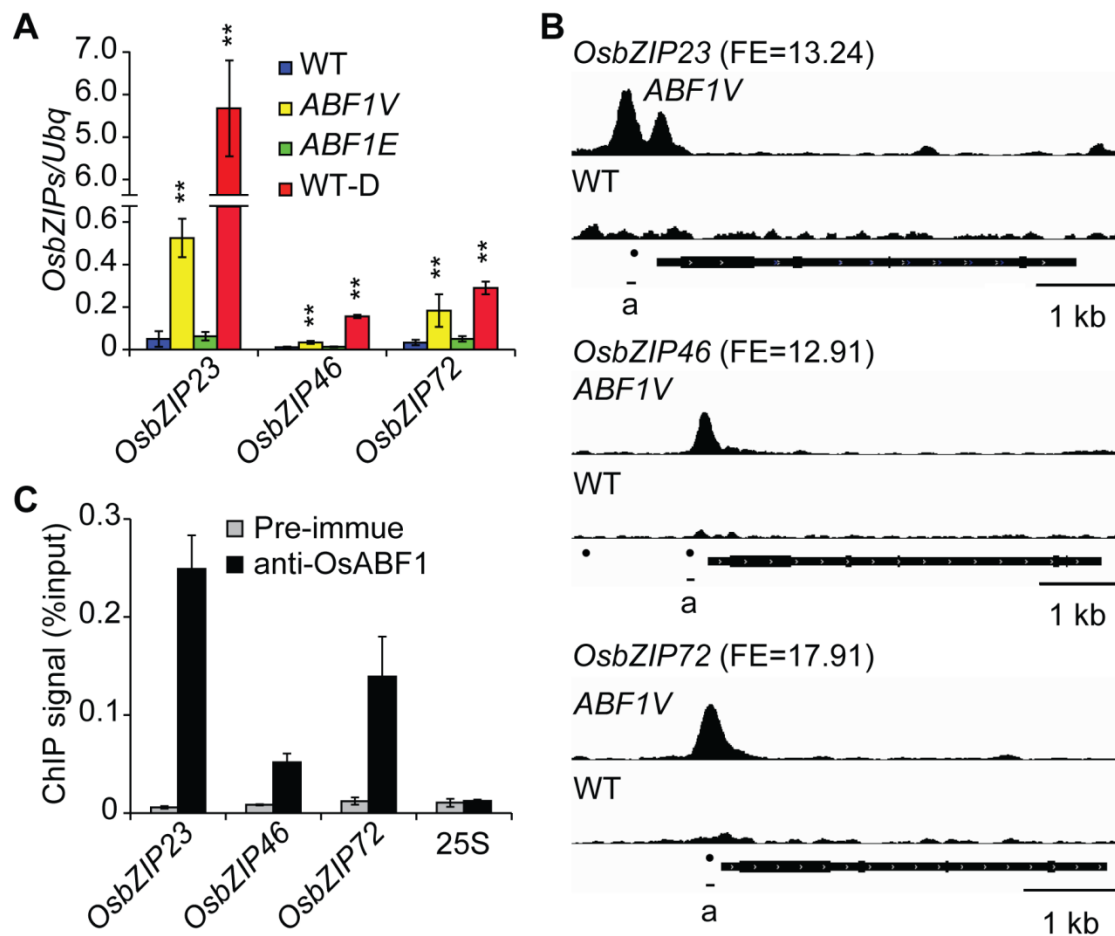

**Supplemental Figure S15.** Identification of *OsbZIP23*, *OsbZIP46*, and *OsbZIP72* as direct targets of OsABF1. A, Transcriptional analysis of *OsbZIPs* in the WT, the *ABF1E* and *ABF1V* transgenic lines, and the WT-D by qRT-PCR with normalization to *Ubq*. Mean values  $\pm$  s.e.m. are shown (Student's *t*-tests,  $**p < 0.01$ ,  $n = 3$ ). B, ABF1V binding profile in the promoter of *OsbZIPs* in the ChIP-seq data. The bar at the bottom represents the position of the DNA fragment containing the ACGTG(G/T)(C/A) motif which indicated with black dots. C, Verification of OsABF1 direct binding to the indicated DNA fragment "a" as shown in (B) by ChIP-qPCR analysis. ChIP samples were prepared using WT rice and precipitated with anti-OsABF1 antibodies or with the pre-immune serum as a negative control. The means  $\pm$  s.d. ( $n = 3$ ) are shown. Results of ChIP-qPCR were quantified by normalization of the immunoprecipitation signal with the corresponding input signal. The binding to 25S rDNA was used as a negative control. The means  $\pm$  s.d. ( $n = 3$ ) are shown.
